# Supplementary material for: Aberrant TGF-β1 signaling activation by MAF underlies pathological lens growth in high myopia
Source: PubMed Central journal article supplement (PMC8032689; doi:10.1038/s41467-021-22041-2), 2021-04-08
Supplement: 41467_2021_22041_MOESM1_ESM.pdf [file 41467_2021_22041_MOESM1_ESM.pdf]

**Supplementary Figure 1. mRNA levels of other crystallins in lens epithelium and protein levels of crystallins in lens mass of highly myopic subjects.**

(a) Examination of mRNA levels of other crystallin genes by qPCR in lens epithelium of highly myopic subjects (n= 4 vs. 4). (b) Examination of protein levels of crystallins in lens mass of highly myopic subjects by parallel reaction monitoring (left: target crystallins n= 5 vs. 5, right: other crystallins n= 3 vs. 3, CRYBB1  $p = 0.002$ , CRYGD  $p = 0.017$ , CRYBA1  $p = 0.010$ ).

n= biological replicates. Pooled lens epithelial samples were used and one lens mass from one eye was used as one sample.

Results are presented as mean  $\pm$  SD. Level of significance was detected using Student's  $t$ -test.

\*\* $p < 0.01$  and \* $p < 0.05$ . Source data are provided as a Source Data file.

**a**

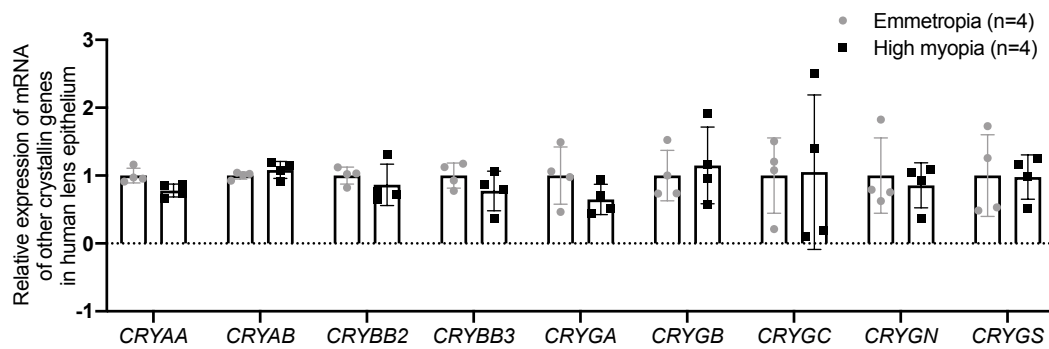

**b**

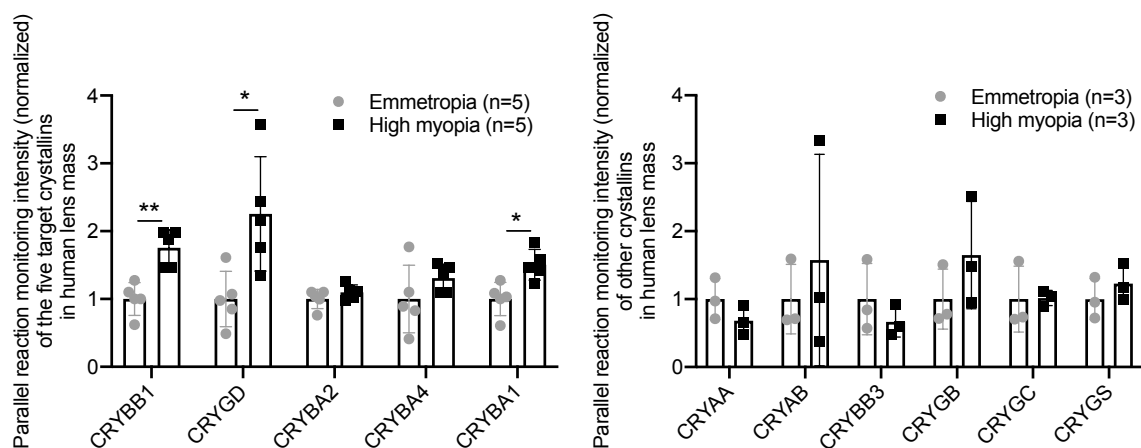

**Supplementary Figure 2. Heat map from gene expression microarray analysis of crystallin genes in mouse lens epithelium.**

(a) Gene expression microarray analysis of crystallin genes in lens epithelium of myopic vs. contralateral control lens in defocus-induced highly myopic mouse model (n=4 vs. 4).

According to the list of 14 genes that human and mouse have in common, *Crybb1*, *Crygd*, *Cryba2*, *Cryba4*, *Crybb3*, *Cryga*, and *Crygs* were significantly up-regulated in myopic eyes.

(b) Gene expression microarray analysis of crystallin genes in lens epithelium of *Irbp* KO mice vs. wild type C57BL/6J mice (n = 3 vs. 4). According to the list of 14 genes that human and mouse have in common, *Crybb1*, *Crygd*, *Cryba4*, *Cryba1*, *Crybb2*, and *Cryga* were significantly up-regulated.

n= biological replicates. Pooled lens epithelial samples were used.

Source data are provided as a Source Data file.

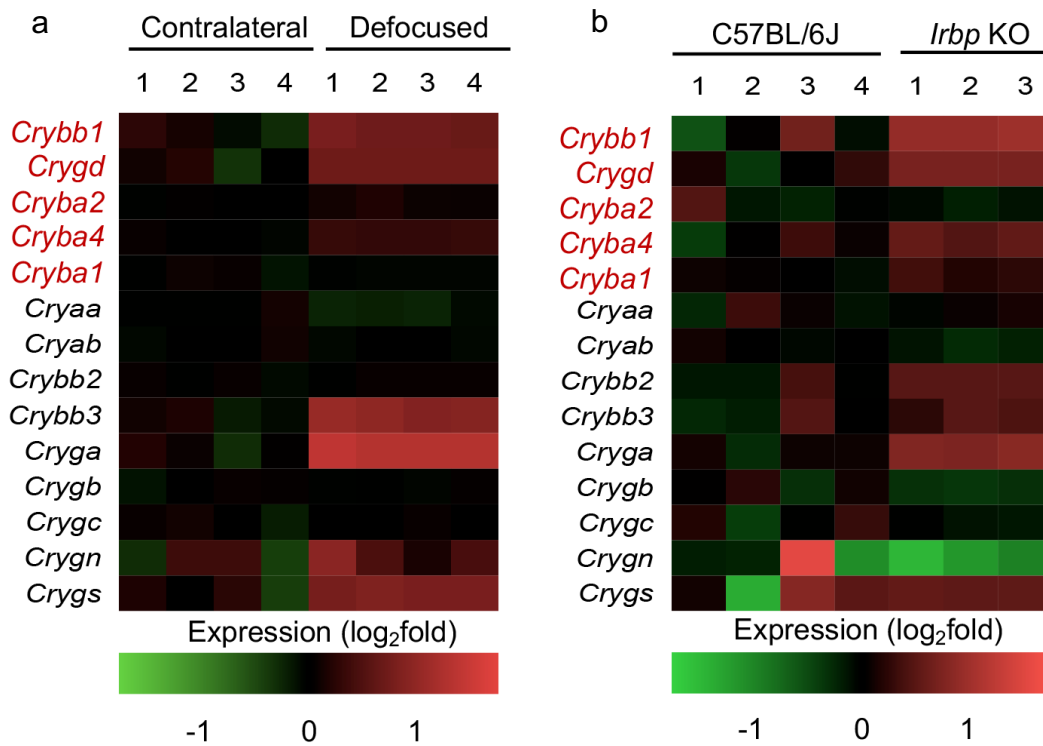

**Supplementary Figure 3. Percentage contribution of different crystallins in total protein of normal human lens.**

CRYBB1, CRYGD, CRYBA2, CRYBA4 and CRYBA1 together constituted around  $28.0 \pm 1.8\%$  of the total protein in normal human lens (n= 3).

n=biological replicates. One lens from one eye was used as one sample.

Source data are provided as a Source Data file.

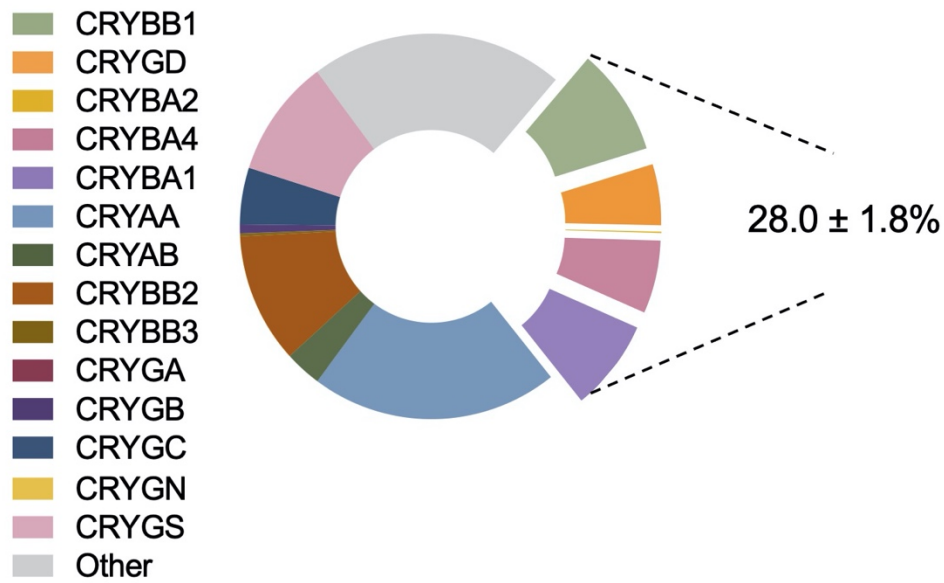

## Supplementary Figure 4. The interface of 3D Slicer showing the calculation of lens volume.

### An emmetropic eye

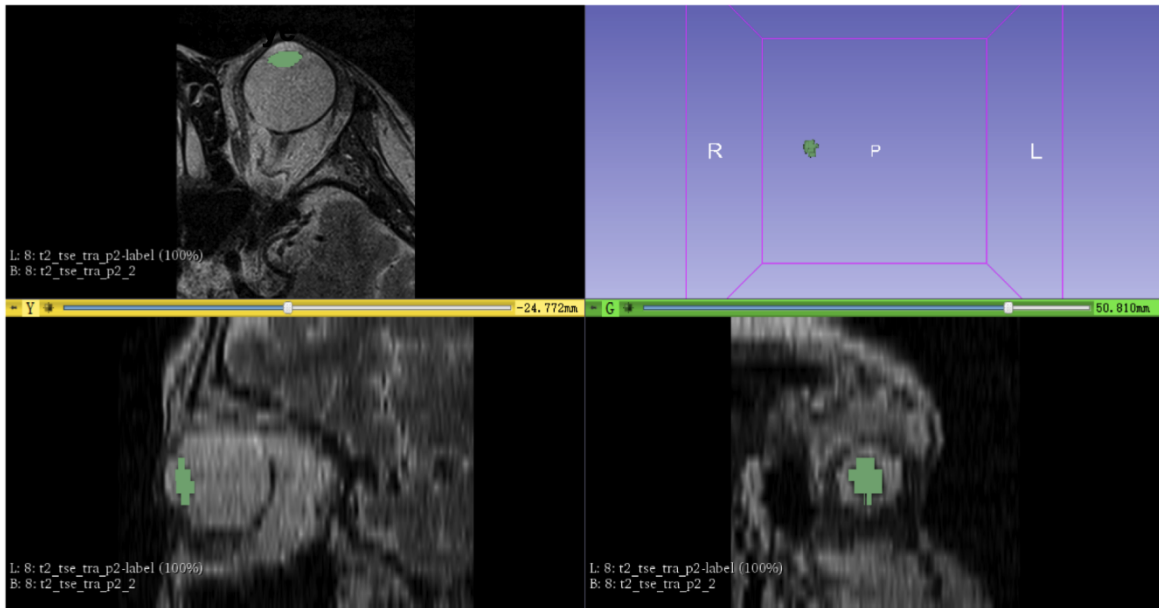

### A highly myopic eye

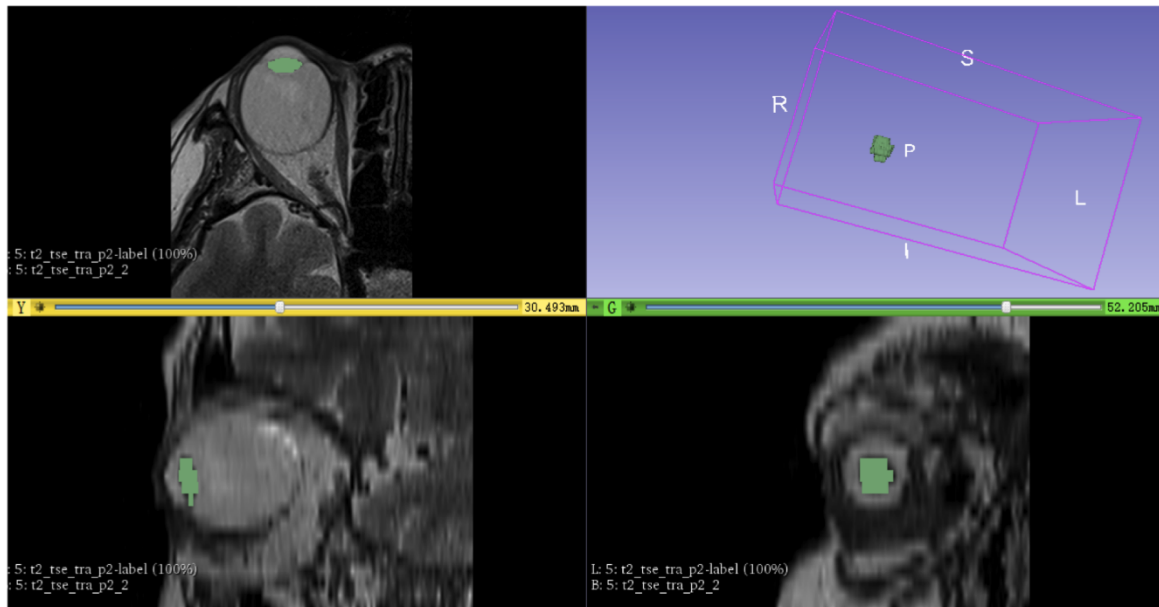

**Supplementary Table S1. Primer sequences for crystallin genes in ChIP-qPCR.**

| Gene   | Range        | Forward Primer        | Reverse Primer     |
|--------|--------------|-----------------------|--------------------|
|        |              | CAGAGGCCCCCCTAGGGG    |                    |
| CRYBB1 | -400, -300   | TAG                   | AGGGGAGACCCTGGGAG  |
|        |              | GTTGCTTTTTTTTGCTCCCCG |                    |
| CRYGD  | -350, -250   | A                     | TGGAAGTGGAGCTTCAG  |
|        |              |                       | TATGGAAGCGGAGGGTCA |
| CRYBA2 | -1750, -1650 | GCTTTGGCTTCCAAAGGTC   | AAG                |
|        |              | GAGACGGGGTCTTGCTCTG   | CTAGGGAGGCTGAGGCAG |
| CRYBA4 | -1380, -1270 | T                     | G                  |
|        |              | ACGATTCCCCTACCTTACC   | CTCACAGGCCCAAGTTAC |
| CRYBA1 | -1856, -1756 | TTCA                  | T                  |

**Supplementary Table S2. Primer sequences for qPCR.**

| Gene          | Genome       | Forward Primer          | Reverse Primer          |
|---------------|--------------|-------------------------|-------------------------|
| <i>CRYBB1</i> | Homo sapiens | CAGCGTGAAGGTCTCCAGTG    | GACTGCATCTGTGGCTGGAA    |
| <i>CRYGD</i>  | Homo sapiens | CCTGTCTTCAGGACCGCTTC    | CCCTGGCATCAGCAGGTACT    |
| <i>CRYBA2</i> | Homo sapiens | GGGAGACTATCCTCGCTGGA    | ACACGGCTGTCATTGTGGTT    |
| <i>CRYBA4</i> | Homo sapiens | GGCTGACAATCTTCGAGCAA    | GTGGACGTGGAAGGACCCTA    |
| <i>CRYBA1</i> | Homo sapiens | GAAACCCTTCCAACCACCAA    | GGAGCTGGTGAACTCCATCC    |
| <i>MAF</i>    | Homo sapiens | CAGCAAGGAGGAGGTGATCC    | GCTGGTTCTTCTCCGACTCC    |
| <i>TGFB1</i>  | Homo sapiens | ATGACAAGTTCAAGCAGAG     | CACTTGCAGTGTGTTATCC     |
| <i>CRYAA</i>  | Homo sapiens | CCTGCTGCCCTTCCTGTCGT    | TCCTGGCGCTCGTTGTGCT     |
| <i>CRYAB</i>  | Homo sapiens | CCAGGATGAACATGGTTTCATC  | ACAGGGATGAAGTAATGGTGAG  |
| <i>CRYBB2</i> | Homo sapiens | TCATAGATGACGATGTACCCAG  | TGTCCTTGTAGTCTCCCTTCTC  |
| <i>CRYBB3</i> | Homo sapiens | ACGAACTAGAGAACTTCCAAGG  | GATAATCCCCCTTCTCCAGAAC  |
| <i>CRYGA</i>  | Homo sapiens | GCGGCTGCTGGATGCTCTATG   | AGGATTGGACCGAGTCGCTGAG  |
| <i>CRYGB</i>  | Homo sapiens | CCCAACCTACAACCCTATTTCA  | CCCTCAATTCATCTCTGTCGTA  |
| <i>CRYGC</i>  | Homo sapiens | CCAAGGTCAACAATACTTGCTG  | CTTCACTCAGCTCCATCATGAG  |
| <i>CRYGN</i>  | Homo sapiens | CTGCTTCAATCACCCCGACTTCC | CATGTGGTCACTGTGGCTGTTCC |

|               |              |                            |                              |
|---------------|--------------|----------------------------|------------------------------|
| <i>CRYGS</i>  | Homo sapiens | TTGCTGGGTACATGTACATCTT     | TTCGGTGGTTTCATACATCTGA       |
| <i>ACTB1</i>  | Homo sapiens | TTGTTACAGGAAGTCCCTTGC<br>C | ATGCTATCACCTCCCCTGTGT<br>G   |
| <i>Crybb1</i> | Mus musculus | GTCTTCGAGCAGGAAAACCTT<br>C | CTTCTCCAGGACAAACATCTC<br>T   |
| <i>Crygd</i>  | Mus musculus | GATGGGTTTCAGTGACTCTGT<br>C | TATCATCTGGCCTCTGTACTC<br>T   |
| <i>Cryba2</i> | Mus musculus | GGACAGCAGTTCATTCTAGA<br>GA | CTGAAGGACAGCAATTGGTTG        |
| <i>Cryba4</i> | Mus musculus | CTTCCAAGGACAGCAATATG<br>TG | GAGAGGGATAGTCATCGTTCA<br>G   |
| <i>Cryba1</i> | Mus musculus | ATGGGTTGGTTCAACAATGA<br>AG | GTATTCGGCGAATTGATTGGA<br>T   |
| <i>Maf</i>    | Mus musculus | GCACTTCGACGACCGCTTCTC      | TCGGATCACCTCCTCCTTGCT<br>G   |
| <i>Tgfb1</i>  | Mus musculus | CCAGATCCTGTCCAAACTAA<br>GG | CTCTTTAGCATAGTAGTCCGC<br>T   |
| <i>Actb</i>   | Mus musculus | GGCAACGAGCGGTTCCGATG       | CAGCACTGTGTTGGCATAGAG<br>GTC |

---

**Supplementary Table S3. Antibody list.**

| Protein                                          | Brand                         | Catalog number | Dilution |
|--------------------------------------------------|-------------------------------|----------------|----------|
| CRYBB1                                           | proteintech, USA              | 60273-1-Ig     | 1:500    |
| CRYGD                                            | Novus, China                  | H0000142-M04   | 1:500    |
| CRYBA2                                           | proteintech, USA              | 15750-1-AP     | 1:2000   |
| CRYBA4                                           | Novus, China                  | NBP1-32741     | 1:500    |
| CRYBA1                                           | Novus, China                  | NBP1-33010     | 1:2000   |
| MAF                                              | Abcam,UK                      | ab77071        | 1:500    |
| TGF- $\beta$ 1                                   | Abcam,UK                      | ab92486        | 1:1000   |
| TGF- $\beta$ RI                                  | Bioss, China                  | bs-0638R       | 1:500    |
| Smad2/3                                          | Abcam,UK                      | ab202445       | 1:1000   |
| p-Smad2/3                                        | Abcam,UK                      | ab63399        | 1:500    |
| Smad4                                            | Abcam,UK                      | ab40759        | 1:2000   |
| $\beta$ -Actin                                   | Weiao, China                  | WB2196         | 1:1500   |
| HRP-labeled Goat Anti-Rabbit IgG(H+L)            | Beyotime, China               | A0208          | 1:1000   |
| HRP-labeled Goat Anti-Mouse IgG(H+L)             | Beyotime, China               | A0216          | 1:1000   |
| Anti-rabbit, Secondary Antibody, Alexa Fluor 488 | Thermo Fisher Scientific, USA | A32790         | 1:500    |
| Anti-mouse, Secondary Antibody, Alexa Fluor 488  | Thermo Fisher Scientific, USA | A-11001        | 1:1000   |
| Rhodamine WGA                                    | Vector Laboratories, USA      | ZD0510         | 1:1000   |
| Hoechst                                          | Beyotime, China               | C1011          | 1:2000   |



**Supplementary Table S4. Peptide sequences for crystallins in parallel reaction monitoring.**

| Protein | Species      | Peptide sequence        |
|---------|--------------|-------------------------|
| CRYBB1  | Homo Sapiens | QWHLEGSFPVLATEPPK       |
| CRYGD   | Homo Sapiens | FNEIHSLNVLEGSWVLYELSNYR |
| CRYBA2  | Homo Sapiens | GYQYVLER                |
| CRYBA4  | Homo Sapiens | EWGSHAPTFQVQSIR         |
| CRYBA1  | Homo Sapiens | ITIYDQENFQGK            |
| CRYAA   | Homo Sapiens | HFSPEDLTVK              |
| CRYAB   | Homo Sapiens | PAVTAAPK                |
| CRYBB3  | Homo Sapiens | HWNEWDASQPQLQSVR        |
| CRYGB   | Homo Sapiens | FLDWGAPNAK              |
| CRYGC   | Homo Sapiens | PNYQGQQYLLR             |
| CRYGS   | Homo Sapiens | VEGGTWAVYER             |
| CRYBB1  | Mus musculus | LIVFEQENFQGR            |
| CRYGD   | Mus musculus | GQMIEFTEDCPSLQDR        |
| CRYBA2  | Mus musculus | GYQYVLER                |
| CRYBA4  | Mus musculus | GFQYILESDHHSQDYK        |
| CRYBA1  | Mus musculus | ITIYDQENFQGK            |
